# Supplementary material for: HIV-1 subtype distribution and its demographic determinants in newly diagnosed patients in Europe suggest highly compartmentalized epidemics
Source: PubMed Central journal article supplement (PMC3564855; doi:10.1186/1742-4690-10-7), 2013-01-14

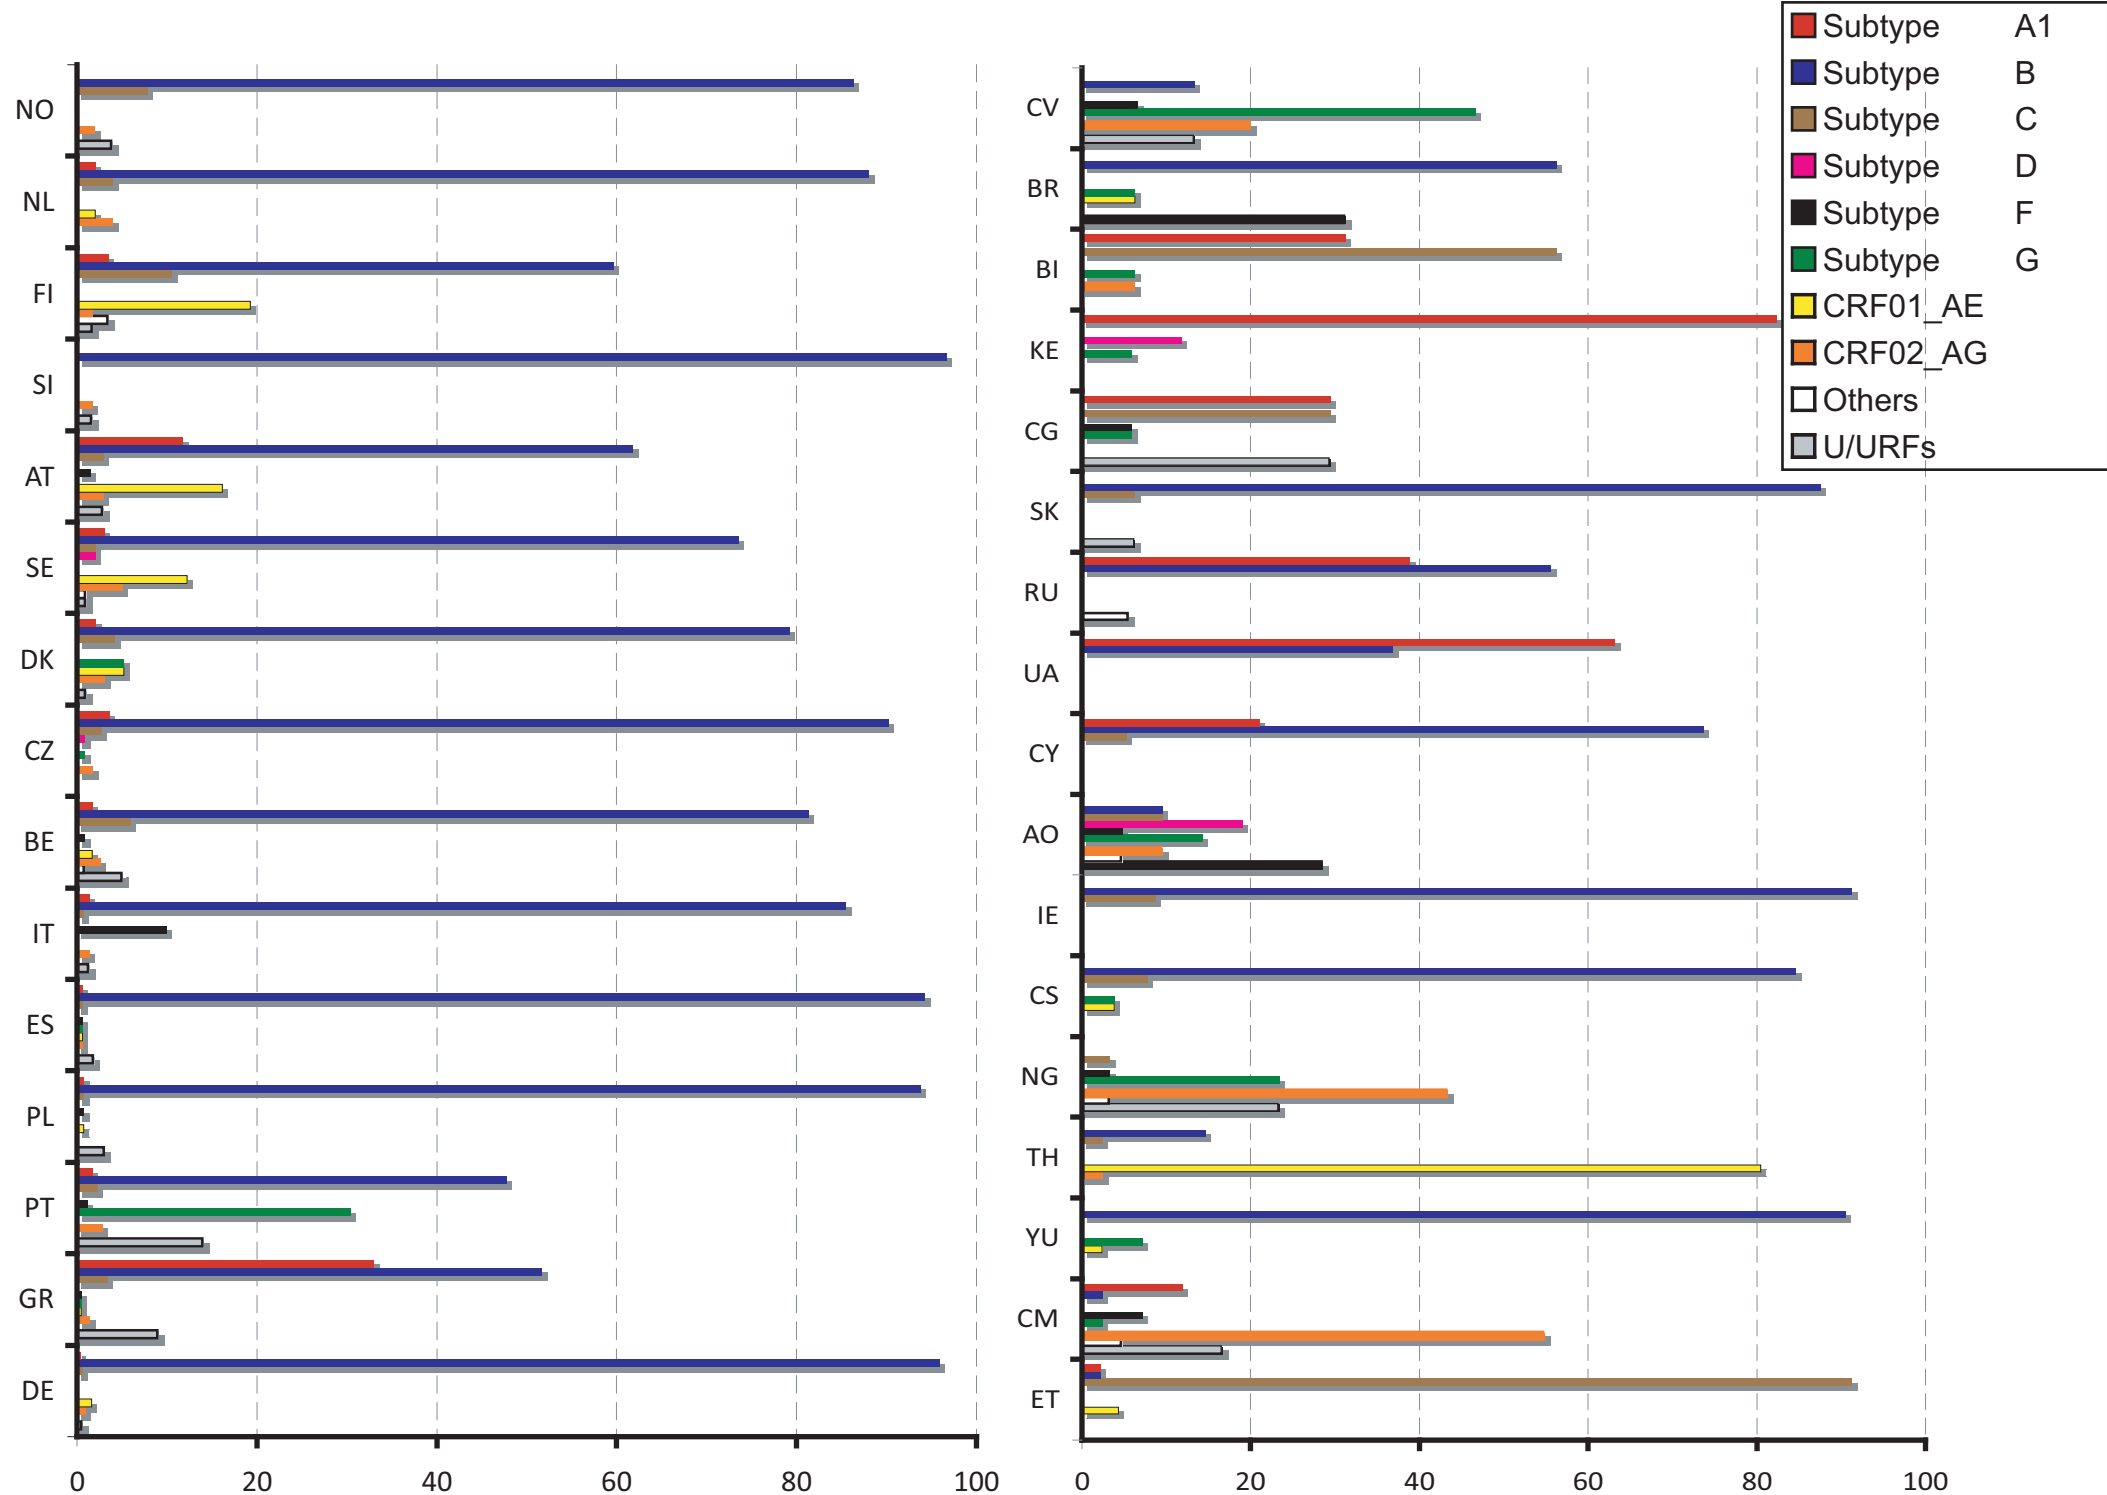

Supplement: 1742-4690-10-7-S5.pdf [file 1742-4690-10-7-S5.pdf]
